# Supplementary material for: Large Variations in Malaria Parasite Carriage by Afebrile School Children Living in Nearby Communities in the Central Region of Ghana
Source: Hindawi journal article supplement (doi:10.1155/2020/4125109), 2020-09-22
Supplement: f1 [file 4125109.f1.zip]

Supplementary file Figure S1. Representative images of *P. falciparum* , *P. malariae*, *P. ovale* and *P. vivax* PCR products

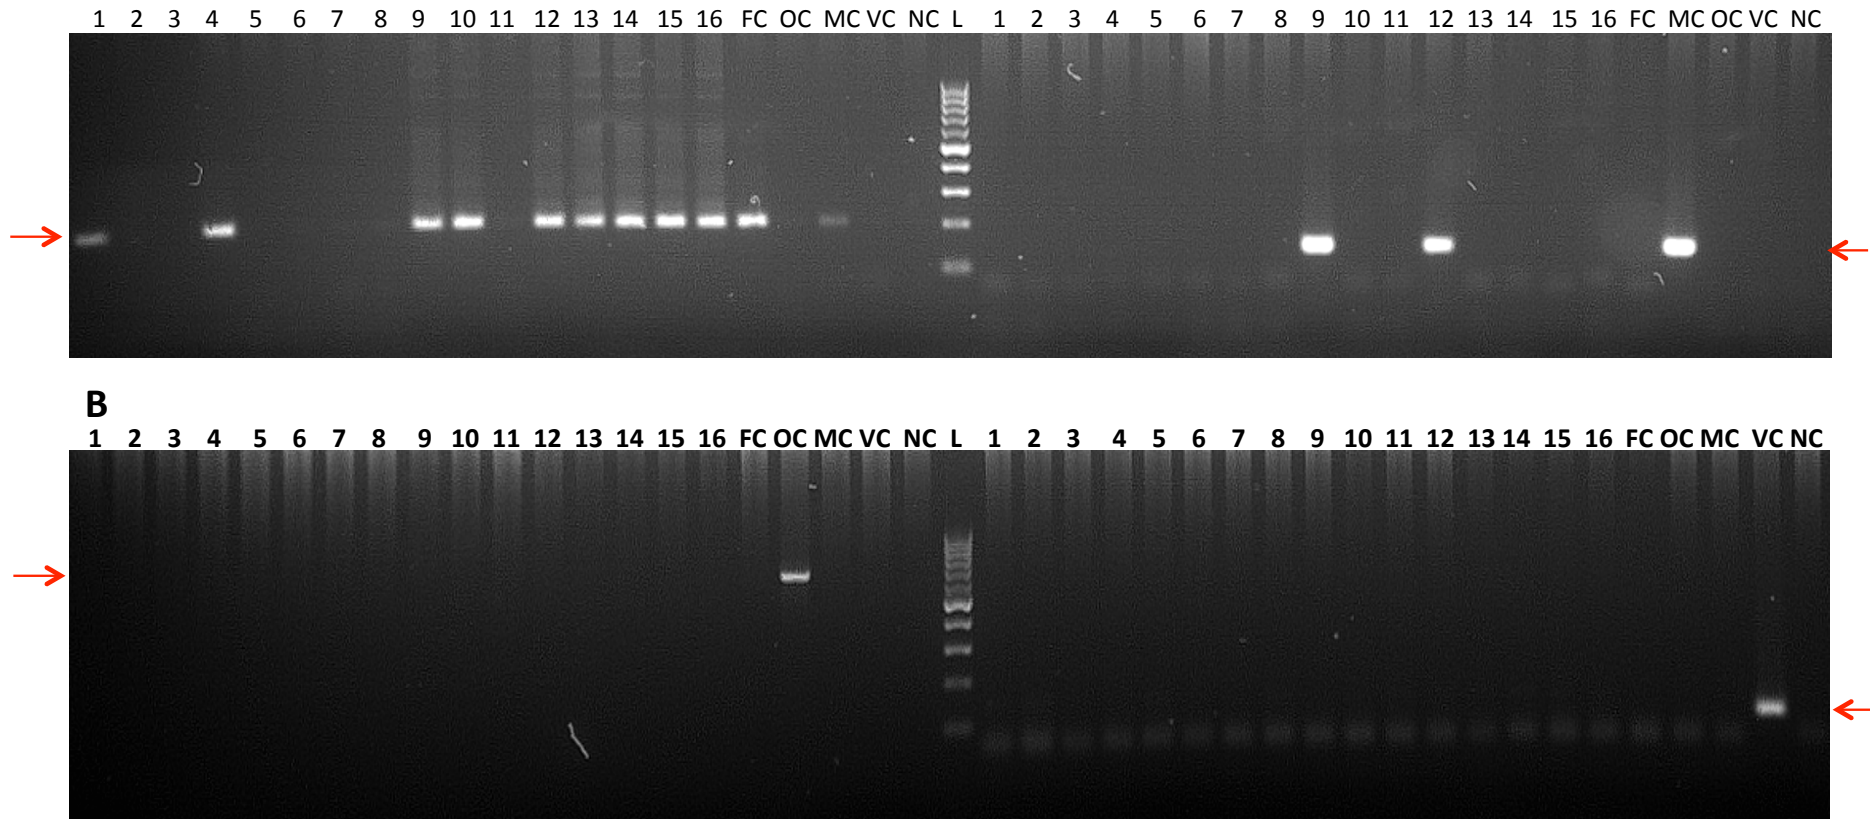

**A:** Left, *P. falciparum* (205 bp); Right, *P. malariae* (144 bp). **B:** Left, *P. ovale* (787 bp); Right, *P. vivax* (117 bp)  
**L**, 100 bp ladder, with the lowest band representing 100 bp and the highest 1000 bp, with each band being 100 bp greater than the band below it.

Lanes **1-16** are representative samples from children from Kuful; **NC** is the negative control (water); **PC** is gDNA from 3D7 (MRA-102, *P. falciparum* control ); **OC** is gDNA from a *P. ovale* field isolate; **MC** is gDNA from a Pf/Pm mixed infection (field isolate) used as an in-house *P. mal* control; **VC** is gDNA from *P. vivax* (obtained as part of the 2019 WHO NAAT EQA Scheme)
